# Supplementary material
Source: publisher figshare collection journal article supplement (https://gsajournals.figshare.com/ndownloader/files/14358350)
Supplement: Supplementary file 1 [file 14358350]

## Sheet: Females
Table S11. Data from GWA, generated from the DGRP Freeze 2.0 pipeline, based on Flybase release version FB2018_1. All SNPs shown passed the P < 10-5 significance threshold; yellow highlighted SNPs passed the FDR threshold of 0.2; green highlighted SNPs overlap with starvation resistance QTL intervals.
	Chromosome	Position	Gene Symbol	FlyBase ID	Association with Starvation-Related Trait; Reference	Site Class	Minor Allele Frequency	Major Allele Frequency	Effect on SR This Study	Effect on Avg SR	Effect on SR Mackay et al	Effect on SR Everman and Morgan	Major Allele Mean	Minor Allele Mean	Mixed P Value	Minor Allele Call	Major Allele Call	Reference Allele
This study	2L	1279359	robo3	FBgn0041097		SNP: INTRON	0.07453	0.92547	22.23	8.50975	2.34391	1.4888	160.04	115.57	7.03854e-08	G	A	A
	2L	1279388	robo3	FBgn0041097		DEL: INTRON	0.06289	0.93711	22.05	8.36897	2.11085	1.35431	160.04	115.945	1.10645e-06	C	CTCGCA	CTCGCA
	2L	1279398	robo3	FBgn0041097		DEL: INTRON	0.07453	0.92547	22.23	8.50975	2.34391	1.4888	160.04	115.57	7.03854e-08	G	GTGCTACGTAATCTTAC	GTGCTACGTAATCTTAC
	2L	6262711	Ddr	FBgn0053531		SNP: INTRON	0.1321	0.8679	14.52	5.86301	2.20494	-0.000348761	160.522	131.492	8.69958e-06	C	T	T
	2L	6262711	CG13983	FBgn0031792		SNP: DOWNSTREAM	0.1321	0.8679	14.52	5.86301	2.20494	-0.000348761	160.522	131.492	8.69958e-06	C	T	T
	2L	7608224	CG6739	FBgn0031926		SNP: UPSTREAM	0.1039	0.8961	-16.76	-7.63963	-2.22563	-2.09085	154.929	188.454	5.06625e-06	T	G	G
	2L	7608224	Cyp4d21	FBgn0031925		SNP: DOWNSTREAM	0.1039	0.8961	-16.76	-7.63963	-2.22563	-2.09085	154.929	188.454	5.06625e-06	T	G	G
	2L	9418933	Mco1	FBgn0032116		SNP: INTRON	0.2875	0.7125	11.05	4.82223	0.949999	1.51978	162.958	140.864	5.50579e-06	A	C	C
	2L	13503056	B4	FBgn0023407	circadian rhythm; Claridge-Chang et al. 2001	SNP: UTR_3_PRIME	0.07143	0.92857	-19.31	-6.93085	-0.518922	-0.940567	153.971	192.588	9.5381e-06	T	A	A
	2L	21919369	GlcAT-P	FBgn0036144	carbohydrate metabolic process; Gaudet et al. 2010	SNP	0.3706	0.6294	11.38	4.50211	1.55702	1.29176	165.416	142.663	2.2071e-06	G	T	T
	2L	21919392				SNP	0.3893	0.6107	10.85	4.51144	1.65348	1.46737	165.74	144.048	3.40535e-06	A	G	G
	2R	13170033	mbl	FBgn0261642		SNP: INTRON	0.465	0.535	-10	-4.36708	-0.99582	-0.200145	147.525	167.533	7.14923e-06	C	A	A
	2R	16916846				SNP	0.1212	0.8788	14.76	4.41564	0.232874	-0.586843	160.598	131.071	8.93672e-06	T	C	C
	2R	18556643	CG30269	FBgn0050269		SNP: DOWNSTREAM	0.4747	0.5253	-9.831	-4.84652	-0.988249	-1.80305	148.253	167.914	9.54805e-06	G	T	T
	2R	18556643	CG13516	FBgn0040658		SNP: UPSTREAM	0.4747	0.5253	-9.831	-4.84652	-0.988249	-1.80305	148.253	167.914	9.54805e-06	G	T	T
	2R	19482740	apt	FBgn0015903		SNP: INTRON	0.2767	0.7233	11.06	6.21133	2.47179	3.9422	163.249	141.133	7.51031e-06	A	G	G
	2R	19482742	apt	FBgn0015903		SNP: INTRON	0.275	0.725	11.15	6.29001	2.52575	3.97591	163.006	140.706	6.06901e-06	A	T	T
	2R	19482745	apt	FBgn0015903		INS: INTRON	0.2658	0.7342	11.48	6.3967	2.44123	3.98366	163.006	140.039	4.54736e-06	AGTT	A	A
	3L	1501905	pUf68	FBgn0028577		SNP: INTRON	0.2625	0.7375	-11.16	-5.9863	-2.60884	-2.11345	150.376	172.694	8.29217e-06	G	T	T
	3L	1501905	Psa	FBgn0261243		SNP: UPSTREAM	0.2625	0.7375	-11.16	-5.9863	-2.60884	-2.11345	150.376	172.694	8.29217e-06	G	T	T
	3L	7062357	CG8641	FBgn0035733		SNP: INTRON	0.1707	0.8293	-13.25	-7.2757	-3.05134	-4.21234	152.352	178.855	4.40373e-06	A	T	T
	3L	7062357	CG32391	FBgn0052391		SNP: UPSTREAM	0.1707	0.8293	-13.25	-7.2757	-3.05134	-4.21234	152.352	178.855	4.40373e-06	A	T	T
	3L	11174930	GlcAT-P	FBgn0036144	carbohydrate metabolic process; Gaudet et al. 2010	SNP: INTRON	0.05521	0.94479	21.69	8.89757	4.34566	1.36322	159.228	115.841	5.47615e-06	C	T	T
	3L	11174943				SNP: INTRON	0.05521	0.94479	22.57	9.23623	3.61835	2.27959	159.228	114.094	2.12391e-06	G	A	A
	3L	11360623				SNP	0.0679	0.9321	19.4	10.4505	6.79949	3.93137	159.472	120.665	8.21119e-06	T	G	G
	3L	15256424				SNP	0.3228	0.6772	10.95	5.61647	2.30891	2.37286	163.459	141.566	3.69422e-06	A	T	T
	3R	6994358	Ugt35b	FBgn0026314		SNP: SYNONYMOUS_CODING	0.1902	0.8098	12.47	5.83285	3.12531	1.15945	161.963	137.02	7.23008e-06	G	C	G
	3R	6999244	Ugt86Dj	FBgn0040250	metabolic process; FlyBase Curators et al. 2004	SNP: UTR_3_PRIME	0.2273	0.7727	11.95	5.64381	2.67795	1.75393	162.912	139.011	8.15692e-06	T	G	G
	3R	6999244	Ugt35a	FBgn0026315		SNP: UPSTREAM	0.2273	0.7727	11.95	5.64381	2.67795	1.75393	162.912	139.011	8.15692e-06	T	G	G
	Chromosome	Position	Gene Symbol	FlyBase ID	Association with Starvation-Related Trait; Reference	Site Class	Minor Allele Frequency	Major Allele Frequency	Effect on SR This Study	Effect on Avg SR	Effect on SR Mackay et al	Effect on SR Everman and Morgan	Major Allele Mean	Minor Allele Mean	Mixed P Value	Minor Allele Call	Major Allele Call	Reference Allele
Average Starvation Resistance	2L	2714332	CG31690	FBgn0051690		SNP: INTRON	0.1053	0.8947	-16.5959	-9.325	-7.03348	-5.3504	154.656	187.848	5.12618e-06	G	A	A
	2L	2997775	CG3558	FBgn0025681		SNP: INTRON	0.1631	0.8369	-11.0476	-6.448	-3.45686	-3.72806	154.039	176.134	6.12893e-06	T	C	T
	2L	2997777	CG3558	FBgn0025681		SNP: INTRON	0.1752	0.8248	-10.6659	-6.307	-3.32528	-3.66712	153.717	175.049	6.46448e-06	G	A	G
	2L	5159192	Msp-300	FBgn0261836		SNP: DOWNSTREAM	0.1871	0.8129	-11.0858	-6.76	-3.56962	-3.86563	153.808	175.979	5.37941e-06	C	T	T
	2L	6077345				SNP	0.05556	0.94444	-20.0048	-11.45	-7.66458	-6.06363	155.617	195.627	9.88053e-07	A	G	G
	2L	8748374				SNP	0.1511	0.8489	-12.366	-6.728	-3.26734	-3.27227	152.861	177.593	9.87681e-06	C	T	T
	2L	10964749	CG33129	FBgn0053129		SNP: DOWNSTREAM	0.1056	0.8944	-15.1778	-8.22	-4.46031	-3.36667	154.252	184.608	5.84922e-06	T	A	A
	2L	10964749	dpr2	FBgn0261871		SNP: UPSTREAM	0.1056	0.8944	-15.1778	-8.22	-4.46031	-3.36667	154.252	184.608	5.84922e-06	T	A	A
	2L	11679088				SNP	0.2734	0.7266	-9.53939	-5.751	-3.79158	-1.69587	151.848	170.927	4.80466e-06	T	A	T
	2L	19825104	sick	FBgn0263873		SNP: INTRON	0.06944	0.93056	-17.1588	-11.55	-7.78886	-8.49415	154.72	189.038	8.17811e-07	A	G	G
	2L	19833264	sick	FBgn0263873		SNP: INTRON	0.1912	0.8088	-10.9126	-6.874	-3.40137	-4.78447	153.878	175.703	9.72777e-06	G	A	A
	2R	10096469	Sox15	FBgn0005613		INS: INTRON	0.05109	0.94891	-20.5412	-11.85	-7.48334	-6.49925	156.106	197.188	5.07019e-06	TTTCT	T	T
	2R	10124157	CG8485	FBgn0033915		SNP: NONSYNONYMOUS_CODING	0.05517	0.94483	-18.9479	-11.92	-8.51216	-6.98497	155.502	193.398	8.33589e-06	C	T	T
	2R	17476408				SNP	0.4964	0.5036	9.54376	5.652	3.10718	3.50395	163.627	144.54	1.64104e-06	T	A	T
	2R	17692165	CR9284	FBgn0046297		SNP: DOWNSTREAM	0.1748	0.8252	-11.8167	-6.89	-3.76802	-3.65381	152.972	176.605	6.06472e-06	G	A	A
	2R	18975758	CG13538	FBgn0034820		SNP: DOWNSTREAM	0.1799	0.8201	-10.776	-6.78	-3.64136	-4.22216	154.377	175.929	4.17947e-06	T	A	A
	2R	18975806	CG13538	FBgn0034820		SNP: DOWNSTREAM	0.1241	0.8759	-13.2575	-8.066	-4.72827	-4.54191	154.302	180.817	6.25057e-07	T	A	A
	2R	19482729	apt	FBgn0015903		SNP: INTRON	0.2908	0.7092	11.6108	6.325	2.98624	4.15546	163.141	139.919	6.55152e-06	A	G	G
	2R	19482730	apt	FBgn0015903		SNP: INTRON	0.295	0.705	11.7288	6.335	2.95519	3.94652	163.363	139.906	7.3122e-06	A	C	C
	2R	19482740	apt	FBgn0015903		SNP: INTRON	0.305	0.695	11.9895	6.342	2.80033	3.90976	163.463	139.484	2.79966e-06	A	G	G
	2R	19482742	apt	FBgn0015903		SNP: INTRON	0.3028	0.6972	12.0926	6.416	2.85663	3.94133	163.222	139.037	2.14713e-06	A	T	T
	2R	19482745	apt	FBgn0015903		INS: INTRON	0.2929	0.7071	12.4847	6.522	2.78328	3.94643	163.222	138.253	2.77103e-06	AGTT	A	A
	2R	19841784	thoc5	FBgn0034939		SNP: INTRON	0.1241	0.8759	-13.712	-8.895	-5.65761	-6.2332	153.366	180.79	4.23944e-07	C	A	A
	2R	19841784	CG3803	FBgn0034938		SNP: UPSTREAM	0.1241	0.8759	-13.712	-8.895	-5.65761	-6.2332	153.366	180.79	4.23944e-07	C	A	A
	2R	19841815	thoc5	FBgn0034939		SNP: INTRON	0.09655	0.90345	-12.7703	-8.575	-5.94305	-6.01451	154.239	179.78	5.05238e-06	T	C	C
	2R	19841815	CG3803	FBgn0034938		SNP: UPSTREAM	0.09655	0.90345	-12.7703	-8.575	-5.94305	-6.01451	154.239	179.78	5.05238e-06	T	C	C
	2R	19841830	thoc5	FBgn0034939		SNP: SYNONYMOUS_CODING	0.1096	0.8904	-13.318	-8.7	-5.74193	-6.07987	154.368	181.004	2.60405e-06	A	G	G
	2R	19841830	CG3803	FBgn0034938		SNP: UPSTREAM	0.1096	0.8904	-13.318	-8.7	-5.74193	-6.07987	154.368	181.004	2.60405e-06	A	G	G
	2R	19843183	thoc5	FBgn0034939		SNP: NONSYNONYMOUS_CODING	0.1458	0.8542	-10.6759	-8.24	-5.47603	-7.18494	153.977	175.329	5.35163e-07	T	G	G
	2R	19843183	CG16787	FBgn0034940		SNP: DOWNSTREAM	0.1458	0.8542	-10.6759	-8.24	-5.47603	-7.18494	153.977	175.329	5.35163e-07	T	G	G
	2R	19974129	snama	FBgn0086129		SNP: UPSTREAM	0.06803	0.93197	-16.0225	-10.93	-9.76322	-5.85184	154.902	186.947	8.35918e-07	T	G	G
	2R	19974129	CG16786	FBgn0034974		SNP: DOWNSTREAM	0.06803	0.93197	-16.0225	-10.93	-9.76322	-5.85184	154.902	186.947	8.35918e-07	T	G	G
	2R	19974764	snama	FBgn0086129		SNP: INTRON	0.06803	0.93197	-16.0225	-10.93	-9.76322	-5.85184	154.902	186.947	8.35918e-07	C	T	T
	2R	19975579	snama	FBgn0086129		SNP: INTRON	0.1806	0.8194	-10.1767	-6.394	-4.06556	-3.69107	153.612	173.965	9.30248e-06	G	T	T
	2R	19975786	snama	FBgn0086129		SNP: SYNONYMOUS_CODING	0.05517	0.94483	-15.1735	-12.11	-11.7846	-8.11994	154.902	185.249	7.26954e-07	C	T	T
	2R	19976557	snama	FBgn0086129		SNP: SYNONYMOUS_CODING	0.1507	0.8493	-13.3377	-7.654	-4.71998	-3.70148	153.252	179.928	4.01051e-07	T	A	A
	2R	19976578	snama	FBgn0086129		SNP: SYNONYMOUS_CODING	0.1448	0.8552	-12.4924	-7.241	-4.62349	-3.38977	153.252	178.237	2.30294e-06	T	C	C
	2R	19982478	gek	FBgn0023081		SNP: SYNONYMOUS_CODING	0.06164	0.93836	-16.1061	-11.79	-11.2119	-6.84249	154.902	187.114	3.77878e-07	A	C	C
	2R	19984341	gek	FBgn0023081		SNP: SYNONYMOUS_CODING	0.06207	0.93793	-16.1675	-11.83	-11.2078	-6.87771	154.779	187.114	3.75168e-07	T	C	C
	3L	7062357	CG8641	FBgn0035733		SNP: INTRON	0.1644	0.8356	-13.0244	-7.276	-3.27696	-4.21234	153.065	179.114	2.31541e-06	A	T	T
	3L	7062357	CG32391	FBgn0052391		SNP: UPSTREAM	0.1644	0.8356	-13.0244	-7.276	-3.27696	-4.21234	153.065	179.114	2.31541e-06	A	T	T
	3L	10570568	A2pb1	FBgn0052062		SNP: INTRON	0.1944	0.8056	-12.1159	-6.79	-2.84466	-3.83854	152.989	177.221	2.2618e-06	T	A	A
	3L	17065975	Rbp6	FBgn0260943		SNP: DOWNSTREAM	0.3088	0.6912	11.2219	6.076	4.5182	1.78038	162.374	139.93	7.4414e-06	C	G	C
	3L	19283846	Gbs-76A	FBgn0036862		SNP: INTRON	0.2128	0.7872	11.1023	7.015	4.96652	4.43354	161.07	138.866	1.4464e-06	T	C	C
	3R	17906815	CG13408	FBgn0038929		SNP: INTRON	0.2214	0.7786	-10.729	-6.504	-2.72421	-4.14172	152.447	173.905	2.49632e-06	C	G	G
	3R	17906943	CG13408	FBgn0038929		SNP: INTRON	0.374	0.626	-8.13949	-5.561	-2.41933	-3.52292	151.27	167.549	8.33619e-06	C	A	A
	3R	21030790	CG13654	FBgn0039290		SNP: INTRON	0.3926	0.6074	8.71435	5.655	3.90722	3.19813	162.884	145.456	9.89918e-06	A	G	G
	3R	21030790	Cad96Ca	FBgn0022800		SNP: INTRON	0.3926	0.6074	8.71435	5.655	3.90722	3.19813	162.884	145.456	9.89918e-06	A	G	G
	X	9212129	c12.1	FBgn0040235		SNP: UTR_3_PRIME	0.1633	0.8367	13.587	7.675	5.26389	4.83628	161.046	133.872	2.47378e-06	A	G	G
	X	9212139	c12.1	FBgn0040235		SNP: UTR_3_PRIME	0.1528	0.8472	13.5458	7.811	5.44643	5.21363	160.901	133.81	4.22587e-06	C	T	T
	X	10025056	CG34104	FBgn0083940		SNP: INTRON	0.09929	0.90071	-15.4368	-8.282	-4.7387	-3.50649	154.08	184.953	9.82055e-06	G	T	T
	X	15581012	CG15599	FBgn0030667		SNP: INTRON	0.4178	0.5822	8.61889	5.496	3.73145	3.68384	163.251	146.013	6.69647e-06	T	C	C
	X	19007401				SNP	0.1216	0.8784	-12.9113	-7.788	-4.5136	-4.71776	153.982	179.805	3.35124e-06	G	C	C
	X	22181142				SNP	0.2276	0.7724	-9.73151	-6.248	-4.72264	-2.99217	152.803	172.266	3.8156e-06	T	C	T
	X	22182202				SNP	0.2055	0.7945	-11.2172	-6.742	-4.56978	-3.16044	152.764	175.198	1.0941e-06	A	G	A
	X	22182666				SNP	0.2041	0.7959	-11.2215	-6.311	-3.83774	-2.65673	152.948	175.391	4.82796e-06	T	C	T
	Chromosome	Position	Gene Symbol	FlyBase ID	Association with Starvation-Related Trait; Reference	Site Class	Minor Allele Frequency	Major Allele Frequency	Effect on SR This Study	Effect on Avg SR	Effect on SR Mackay et al	Effect on SR Everman and Morgan	Major Allele Mean	Minor Allele Mean	Mixed P Value	Minor Allele Call	Major Allele Call	Reference Allele
Mackay et al. 2012	2L	11703508				SNP:	0.4341	0.5659	4.87466	3.41469	3.777	1.10879	161.797	152.048	9.25569e-06	A	G	G
	2L	13142019	CG9928	FBgn0032472		SNP: DOWNSTREAM	0.08718	0.91282	5.80303	6.04389	6.793	5.45265	158.504	146.898	5.2457e-06	T	C	C
	2L	14416394	pburs	FBgn0264810		SNP: DOWNSTREAM	0.1071	0.8929	-6.72727	-5.72686	-5.467	-3.36749	155.869	169.324	7.81139e-06	A	G	G
	2L	15284643	CG15263	FBgn0028853		SNP: UPSTREAM	0.08586	0.91414	-2.06063	-4.10417	-6.167	-4.16905	156.746	160.867	8.29152e-06	A	T	T
	2L	18910259				SNP:	0.07292	0.92708	-1.88766	-4.3976	-6.993	-3.03666	156.883	160.658	7.8644e-06	A	C	C
	2R	14322783	CG30118	FBgn0050118	Control vs. Starvation Selected; Sørensen et al. 2007	SNP: INTRON	0.06566	0.93434	-3.93879	-3.67192	-7.869	-1.10989	156.716	164.594	1.50156e-06	T	G	G
	2R	15858356				SNP:	0.05729	0.94271	-2.54514	-5.89268	-8.689	-3.85239	156.434	161.524	3.41759e-06	A	C	C
	2R	19917770	CG3163	FBgn0034961		SNP: SYNONYMOUS_CODING	0.05446	0.94554	-5.85712	-7.41717	-8.845	-5.82451	156.492	168.206	3.32749e-06	T	C	C
	2R	19917770	CG30172	FBgn0050172		SNP: DOWNSTREAM	0.05446	0.94554	-5.85712	-7.41717	-8.845	-5.82451	156.492	168.206	3.32749e-06	T	C	C
	2R	19972748	CG16786	FBgn0034974		SNP: SYNONYMOUS_CODING	0.1709	0.8291	-10.4732	-8.28306	-5.554	-3.78755	155.752	176.699	1.0898e-06	A	G	G
	2R	19974129	snama	FBgn0086129		SNP: UPSTREAM	0.05473	0.94527	-8.94452	-6.96463	-9.7	-2.07455	153.889	171.778	1.13101e-07	T	G	G
	2R	19974129	CG16786	FBgn0034974		SNP: DOWNSTREAM	0.05473	0.94527	-8.94452	-6.96463	-9.7	-2.07455	153.889	171.778	1.13101e-07	T	G	G
	2R	19974764	snama	FBgn0086129		SNP: INTRON	0.05473	0.94527	-16.0225	-10.932	-9.7	-5.11449	154.902	186.947	1.13101e-07	C	T	T
	2R	19976766	snama	FBgn0086129		SNP: NON_SYNONYMOUS_CODING	0.0597	0.9403	-16.0225	-10.932	-9.005	-5.11449	154.902	186.947	3.61179e-07	G	A	A
	2R	19976832	snama	FBgn0086129		SNP: INTRON	0.065	0.935	-11.8174	-8.71884	-8.217	-3.70633	155.269	178.903	1.00626e-06	A	G	G
	2R	19978833	snama	FBgn0086129		SNP: SYNONYMOUS_CODING	0.1289	0.8711	-12.6208	-8.95677	-5.537	-3.90836	155.398	180.64	8.89315e-06	A	G	G
	2R	19978833	Gek	FBgn0023081		SNP: DOWNSTREAM	0.1289	0.8711	-12.6208	-8.95677	-5.537	-3.90836	155.398	180.64	8.89315e-06	A	G	G
	2R	19982478	gek	FBgn0023081		SNP: SYNONYMOUS_CODING	0.055	0.945	-10.2593	-7.01018	-10.39	-3.188	153.603	174.121	6.86909e-09	A	C	C
	2R	19982493	gek	FBgn0023081		SNP: SYNONYMOUS_CODING	0.1061	0.8939	-16.6787	-11.7937	-6.884	-5.93373	154.636	187.993	7.75173e-07	C	T	T
	2R	19983763	gek	FBgn0023081		SNP: NON_SYNONYMOUS_CODING	0.2328	0.7672	-10.4513	-7.63162	-4.488	-3.00855	154.509	175.412	9.32829e-06	T	G	G
	2R	19984116	gek	FBgn0023081		SNP: SYNONYMOUS_CODING	0.08163	0.91837	-2.54358	-3.5562	-8.01	-0.66076	155.43	160.517	4.27392e-07	T	G	G
	2R	19984341	gek	FBgn0023081		SNP: SYNONYMOUS_CODING	0.05025	0.94975	-10.404	-8.39389	-9.855	-3.36717	154.892	175.7	2.26219e-07	T	C	C
	2R	20138957	nord	FBgn0050418		SNP: INTRON	0.06	0.94	-15.2225	-11.83	-8.274	-6.87771	154.697	185.142	5.3491e-06	C	A	A
	2R	20138957	Ir60a	FBgn0086029		SNP: DOWNSTREAM	0.06	0.94	-15.2225	-11.83	-8.274	-6.87771	154.697	185.142	5.3491e-06	C	A	A
	2R	20138957	snoRNA:Me18S-A1597	FBgn0034994		SNP: UPSTREAM	0.06	0.94	-15.2225	-11.83	-8.274	-6.87771	154.697	185.142	5.3491e-06	C	A	A
	2R	20139544	nord	FBgn0050418		SNP: INTRON	0.06122	0.93878	-11.6119	-8.38155	-8.304	-3.65228	155.056	178.279	3.35177e-06	C	A	A
	2R	20139544	Ir60a	FBgn0086029		SNP: DOWNSTREAM	0.06122	0.93878	-11.6119	-8.38155	-8.304	-3.65228	155.056	178.279	3.35177e-06	C	A	A
	2R	20139544	snoRNA:Me18S-A1597	FBgn0034994		SNP: UPSTREAM	0.06122	0.93878	-11.6119	-8.38155	-8.304	-3.65228	155.056	178.279	3.35177e-06	C	A	A
	2R	3105252	pk	FBgn0003090		SNP: INTRON	0.06667	0.93333	-12.2373	-8.54587	-6.24	-3.37524	154.825	179.3	8.95028e-06	A	T	T
	2R	4236880	pdm3	FBgn0261588		SNP: INTRON	0.4239	0.5761	-4.88351	-4.43868	-3.866	-3.57996	155.295	165.062	6.17149e-06	T	A	A
	3L	13796804	bru-3	FBgn0264001		DEL: UPSTREAM	0.08475	0.91525	-4.88351	-4.43868	-6.484	-3.57996	155.295	165.062	5.87367e-06	A	AA	AA
	3L	16388169	Grp	FBgn0036627		SNP: SYNONYMOUS_CODING	0.3958	0.6042	-8.24154	-5.26273	4.099	-3.17167	154.156	170.639	7.58031e-06	T	C	T
	3L	17032067	scaf6	FBgn0261872	Control vs. Starvation Selected; Sørensen et al. 2007	SNP: INTRON	0.06	0.94	-7.5006	-7.81941	-8.836	-6.71238	156.127	171.128	1.15001e-06	C	T	T
	3L	22171534	olf413	FBgn0037153		DEL: INTRON	0.09581	0.90419	-7.45772	-7.72426	-7.313	-6.37129	156.127	171.043	2.33273e-06	G	GTT	GTT
	3L	4871845	CG17150	FBgn0035581		SNP: INTRON	0.21	0.79	-4.50644	-4.28322	4.72	-4.0547	155.549	164.562	7.67147e-06	G	A	G
	3L	542184	Cypl	FBgn0035141		SNP: UTR_3_PRIME	0.1485	0.8515	3.27203	3.59341	-5.269	1.78801	158.453	151.909	9.84818e-06	G	A	A
	3L	542184	hipk	FBgn0035140		SNP: DOWNSTREAM	0.1485	0.8515	3.27203	3.59341	-5.269	1.78801	158.453	151.909	9.84818e-06	G	A	A
	3L	542184	CG17180	FBgn0035142		SNP: UPSTREAM	0.1485	0.8515	3.27203	3.59341	-5.269	1.78801	158.453	151.909	9.84818e-06	G	A	A
	3L	542217	Cypl	FBgn0035141		SNP: UTR_3_PRIME	0.1485	0.8515	-3.87303	-4.67211	-5.269	-3.04352	156.347	164.093	9.84818e-06	T	C	C
	3L	542217	hipk	FBgn0035140		SNP: DOWNSTREAM	0.1485	0.8515	-3.87303	-4.67211	-5.269	-3.04352	156.347	164.093	9.84818e-06	T	C	C
	3L	542217	CG17180	FBgn0035142		SNP: UPSTREAM	0.1485	0.8515	-3.87303	-4.67211	-5.269	-3.04352	156.347	164.093	9.84818e-06	T	C	C
	3L	568817	hipk	FBgn0035142		SNP: INTRON	0.175	0.825	6.37102	4.65487	-4.763	2.46622	160.509	147.767	8.85701e-06	T	A	A
	3L	569471	hipk	FBgn0035142		SNP: INTRON	0.06436	0.93564	-5.32394	-5.85124	-8.139	-1.93455	155.935	166.583	9.96862e-07	A	G	G
	3L	569491	hipk	FBgn0035142		SNP: INTRON	0.0597	0.9403	-10.7547	-7.19351	-8.202	-3.63398	155.029	176.538	2.17843e-06	A	C	C
	3L	569508	hipk	FBgn0035142		SNP: INTRON	0.1675	0.8325	-3.98489	-5.84273	-4.966	-4.23238	156.057	164.026	4.84429e-06	T	G	G
	3R	17806411	Eip93F	FBgn0264490		SNP: INTRON	0.1117	0.8883	-8.93945	-7.43031	-5.897	-3.71697	154.629	172.508	8.4753e-06	G	C	C
	3R	19030449	cnc	FBgn0262975	determination of adult lifespan; Sykiotis and Bohmann, 2008	INS: INTRON	0.2994	0.7006	-4.74311	-4.47784	-4.742	-1.94125	154.311	163.798	3.0039e-06	GTT	G	G
	3R	19030449	fzo	FBgn0011596		INS: UPSTREAM	0.2994	0.7006	-4.74311	-4.47784	-4.742	-1.94125	154.311	163.798	3.0039e-06	GTT	G	G
	3R	4723832	pyd	FBgn0262614		DEL: INTRON	0.09424	0.90576	0.7331	-2.06532	-7.072	-1.69971	158	156.534	1.83475e-06	T	TCTGCAAATCACAAT	TCTGCAAATCACAAT
	X	18245824	CG6123	FBgn0030913		INS: INTRON	0.08081	0.91919	-12.6788	-8.65921	-7.54	-4.2794	154.99	180.347	4.48739e-06	AGA	C	C
	Chromosome	Position	Gene Symbol	FlyBase ID	Association with Starvation-Related Trait; Reference	Site Class	Minor Allele Frequency	Major Allele Frequency	Effect on SR This Study	Effect on Avg SR	Effect on SR Mackay et al	Effect on SR Everman and Morgan	Major Allele Mean	Minor Allele Mean	Mixed P Value	Minor Allele Call	Major Allele Call	Reference Allele
Everman and Morgan 2018	2L	1099737	CG4629	FBgn0031299		SNP: INTRON	0.3158	0.6842	-2.57524	-3.14273	-1.36887	-4.705	160.245	155.094	6.15848e-06	A	G	G
	2L	6388159	CG42368	FBgn0259714		INS: INTRON	0.1867	0.8133	7.23863	5.28723	2.21502	5.374	145.011	159.488	6.188e-06	TT	T	T
	2R	4079236	LRP1	FBgn0053087		SNP: INTRON	0.06962	0.93038	-7.96107	-7.27531	-4.59687	-8.614	171.868	155.945	7.64312e-06	G	T	T
	2R	9172334	Dh31-R1	FBgn0052843		SNP: INTRON	0.2273	0.7727	-3.39651	-4.01257	-2.70067	-5.59	162.787	155.994	6.11456e-06	A	T	T
	2R	9174135	Dh31-R1	FBgn0052843		SNP: INTRON	0.1313	0.8687	-2.06348	-4.12283	-3.48846	-6.798	160.293	156.166	9.65567e-07	T	C	C
	2R	9176195	Dh31-R1	FBgn0052843		SNP: INTRON	0.1447	0.8553	-3.7266	-5.10902	-4.54247	-6.846	163.064	155.611	2.57864e-07	T	A	A
	2R	9176199	Dh31-R1	FBgn0052843		SNP: INTRON	0.1392	0.8608	-2.90425	-4.29454	-3.60233	-6.304	161.419	155.611	4.10587e-06	A	T	T
	2R	9176268	Dh31-R1	FBgn0052843		SNP: INTRON	0.4366	0.5634	-5.17562	-5.22884	-3.20728	-4.973	163.897	153.545	4.9081e-06	T	A	A
	2R	9176385	Dh31-R1	FBgn0052843		SNP: INTRON	0.1226	0.8774	-4.47833	-5.25021	-4.13133	-7.08	164.381	155.425	9.77562e-07	G	C	C
	2R	9176685	Dh31-R1	FBgn0052843		SNP: INTRON	0.1392	0.8608	-2.40378	-4.33387	-4.12424	-6.387	160.699	155.892	3.7011e-06	A	T	T
	2R	17442627	Egfr	FBgn0003731	determination of adult lifespan; Kamakura 2011	SNP: INTRON	0.2516	0.7484	7.85294	5.4734	2.89986	5.344	144.817	160.523	2.76344e-06	T	C	C
	2R	17442631	Egfr	FBgn0003731	determination of adult lifespan; Kamakura 2011	INS: INTRON	0.2516	0.7484	6.73231	5.02666	2.33122	5.689	147.467	160.931	2.88293e-07	TG	T	T
	2R	17442683	Egfr	FBgn0003731	determination of adult lifespan; Kamakura 2011	SNP: INTRON	0.2658	0.7342	7.42796	5.04411	2.41365	5.033	145.78	160.636	5.14576e-06	T	C	C
	2R	19541130	retn	FBgn0004795		SNP: NONSYNONYMOUS_CODING	0.2597	0.7403	-4.77806	-4.85584	-2.82827	-5.311	164.309	154.752	2.30719e-06	C	T	T
	2R	19843183	thoc5	FBgn0034939		SNP: NONSYNONYMOUS_CODING	0.1447	0.8553	-10.6759	-8.23968	-4.98818	-6.329	175.329	153.977	2.75004e-06	T	G	G
	2R	19843183	CG16787	FBgn0034940		SNP: DOWNSTREAM	0.1447	0.8553	-10.6759	-8.23968	-4.98818	-6.329	175.329	153.977	2.75004e-06	T	G	G
	3L	3980873				SNP	0.4304	0.5696	-3.46437	-3.57517	-2.02397	-4.037	160.851	153.923	9.25589e-06	A	G	G
	3L	3980993				SNP	0.3101	0.6899	-2.10525	-2.50162	-1.20591	-4.495	159.967	155.756	3.51067e-06	T	C	C
	3L	3980996				SNP	0.3168	0.6832	-1.78521	-2.5563	-1.33338	-4.329	159.315	155.745	5.61769e-06	G	A	A
	3L	8800476	CG13312	FBgn0035931		SNP: UPSTREAM	0.06707	0.93293	-10.4879	-7.88285	-4.45303	-8.262	176.727	155.751	8.39475e-06	A	G	G
	3L	8800476	CG32024	FBgn0052024		SNP: UPSTREAM	0.06707	0.93293	-10.4879	-7.88285	-4.45303	-8.262	176.727	155.751	8.39475e-06	A	G	G
	3L	9951776	CG34356	FBgn0085385		SNP: INTRON	0.4557	0.5443	5.45352	4.30321	3.24293	4.296	150.674	161.581	6.35976e-06	C	T	C
	3R	11211082	Rbp	FBgn0262483		SNP: SYNONYMOUS_CODING	0.2365	0.7635	3.24748	3.10551	2.16266	5.237	150.836	157.331	9.62244e-06	C	T	T
	3R	13346027				SNP	0.2237	0.7763	6.89259	4.40584	2.0572	5.634	145.702	159.487	2.75343e-06	A	G	A
	3R	16036480	CG34139	FBgn0083975	sleep; Li et al 2013	SNP: INTRON	0.1926	0.8074	-2.89354	-4.38395	-2.22167	-6.579	162.223	156.436	8.26311e-06	G	C	C
	3R	16036480	CG17199	FBgn0038775		SNP: UPSTREAM	0.1926	0.8074	-2.89354	-4.38395	-2.22167	-6.579	162.223	156.436	8.26311e-06	G	C	C
	3R	26129589	hdc	FBgn0010113		SNP: INTRON	0.3067	0.6933	3.62711	2.94263	2.22226	4.441	152.158	159.412	2.93857e-06	T	C	T
	X	20550179				SNP	0.1043	0.8957	-11.2627	-7.60374	-3.62607	-7.572	177.372	154.847	1.91192e-06	A	C	C

## Sheet: Males
Table S11. Data from GWA, generated from the DGRP Freeze 2.0 pipeline, based on Flybase release version FB2018_1. All SNPs shown passed the P < 10-5 significance threshold; yellow highlighted SNPs passed the FDR threshold of 0.2; green highlighted SNPs overlap with starvation resistance QTL intervals.
	Chromosome	Position	Gene Symbol	FlyBase ID	Association with Starvation-Related Trait; Reference	Site Class	Minor Allele Frequency	Major Allele Frequency	MinorAlleleCount	MajorAlleleCount	Effect on SR This Study	Effect on Avg SR	Effect on SR Mackay et al	Effect on SR Everman and Morgan	Major Allele Mean	Minor Allele Mean	Mixed P Value	Minor Allele Call	Major Allele Call	Reference Allele
This Study	2L	1279359	robo3	FBgn0041097		SNP: INTRON	0.07453	0.92547	12	149	19.77	7.49947	1.94042	1.05651	128.183	88.6523	2.90768e-07	G	A	A
	2L	1279388	robo3	FBgn0041097		DEL: INTRON	0.06289	0.93711	10	149	20.57	8.10342	2.73973	1.05595	128.183	87.0468	1.03052e-06	C	CTCGCA	CTCGCA
	2L	1279398	robo3	FBgn0041097		DEL: INTRON	0.07453	0.92547	12	149	19.77	7.49947	1.94042	1.05651	128.183	88.6523	2.90768e-07	G	GTGCTACGTAATCTTAC	GTGCTACGTAATCTTAC
	2L	6530949	eya	FBgn0000320		SNP: INTRON	0.46	0.54	69	81	9.405	3.5676	0.287744	0.803953	133.952	115.142	9.55847e-06	G	A	G
	2L	7150523	Pvf3	FBgn0085407		SNP: INTRON	0.3038	0.6962	48	110	-9.979	-5.27848	-1.61735	-2.67746	118.75	138.709	8.59339e-06	T	C	T
	2L	20208967				INS	0.1224	0.8776	18	129	-14.85	-6.63542	-2.34315	-1.8055	122.611	152.312	5.13359e-06	AACTA	A	A
	2R	1373860	CG30440	FBgn0050440		SNP: INTRON	0.1633	0.8367	24	123	-12.98	-4.92844	0.66372	-1.06788	120.936	146.886	7.21547e-06	T	A	A
	2R	1373861	CG30440	FBgn0050440		SNP: INTRON	0.1633	0.8367	24	123	-12.98	-4.92844	0.66372	-1.06788	120.936	146.886	7.21547e-06	T	G	G
	2R	13170033	mbl	FBgn0261642		SNP: INTRON	0.465	0.535	73	84	-9.513	-3.94444	-0.212812	-0.575145	115.923	134.949	4.33185e-06	C	A	A
	2R	14409773	CG43066	FBgn0262476		SNP: INTRON	0.06061	0.93939	10	155	-19.19	-6.52053	1.34783	-0.0660744	122.802	161.173	5.59217e-06	C	T	T
	2R	14411549	CG43066	FBgn0262476		SNP: INTRON	0.09202	0.90798	15	148	-16.21	-5.75733	1.03019	-0.529344	122.002	154.427	3.72746e-06	T	C	C
	2R	18224778	Liprin-gamma	FBgn0034720		SNP: DOWNSTREAM	0.283	0.717	45	114	-10.53	-4.57392	-0.636522	-1.08396	119.15	140.211	3.75601e-06	C	G	G
	3L	1501933	pUf68	FBgn0028577		SNP: INTRON, UPSTREAM	0.2822	0.7178	46	117	-10.22	-5.15231	-1.74032	-2.0501	119.406	139.843	5.78195e-06	T	C	C
	3L	1501933	Psa	FBgn0261243		SNP: UPSTREAM	0.2822	0.7178	46	117	-10.22	-5.15231	-1.74032	-2.0501	119.406	139.843	5.78195e-06	T	C	C
	3L	7487896	Cyp4d8	FBgn0015033		SNP: SYNONYMOUS_CODING	0.4479	0.5521	73	90	9.268	4.42244	1.77573	2.0773	132.903	114.367	5.5114e-06	C	T	T
	3L	7487911	Cyp4d8	FBgn0015033		SNP: SYNONYMOUS_CODING	0.4601	0.5399	75	88	-10.45	-4.83809	-1.24032	-1.6235	115.738	136.644	2.17189e-07	A	G	A
	3L	9078149	Tequila	FBgn0023479	glucose homeostasis; Huang et al. 2015	SNP: INTRON	0.4817	0.5183	79	85	9.002	3.3646	0.656209	0.357707	133.703	115.699	8.88855e-06	C	G	G
	3L	11174943	GlcAT-P	FBgn0036144	carbohydrate metabolic process; Gaudet et al. 2010	SNP: INTRON	0.05521	0.94479	9	154	19.67	7.43176	1.73805	1.45952	127.186	87.8468	9.7522e-06	G	A	A
	3R	6994358	Ugt35b	FBgn0026314		SNP: SYNONYMOUS_CODING	0.1902	0.8098	31	132	11.51	5.18185	2.2734	1.22225	129.801	106.776	8.61846e-06	G	C	G
	3R	22634157	Tl	FBgn0262473		INS: INTRON	0.1646	0.8354	26	132	12.71	4.66402	0.303431	0.176767	129.324	103.904	4.72019e-06	TGTACTATG	T	T
	Chromosome	Position	Gene Symbol	FlyBase ID	Association with Starvation-Related Trait; Reference	Site Class	Minor Allele Frequency	Major Allele Frequency	MinorAlleleCount	MajorAlleleCount	Effect on SR This Study	Effect on Avg SR	Effect on SR Mackay et al	Effect on SR Everman and Morgan	Major Allele Mean	Minor Allele Mean	Mixed P Value	Minor Allele Call	Major Allele Call	Reference Allele
Average Starvation Resistance	4	520444				SNP	0.3147	0.6853	45	98	9.71305	4.965	2.43984	2.65945	129.693	110.267	5.42012e-06	C	T	T
	2L	7150523	Pvf3	FBgn0085407		SNP: INTRON	0.3191	0.6809	45	96	-10.0507	-5.278	-1.54687	-2.67746	119.108	139.209	1.29067e-06	T	C	T
	2R	19482745	apt	FBgn0015903		INS: INTRON	0.2929	0.7071	41	99	9.71359	5.006	2.1706	2.84527	130.118	110.691	9.05095e-06	AGTT	A	A
	3L	1501905	pUf68	FBgn0028577		SNP: INTRON	0.2639	0.7361	38	106	-10.1826	-5.228	-2.07306	-2.33691	119.87	140.235	5.07549e-06	G	T	T
	3L	1501905	Psa	FBgn0261243		SNP: UPSTREAM	0.2639	0.7361	38	106	-10.1826	-5.228	-2.07306	-2.33691	119.87	140.235	5.07549e-06	G	T	T
	3L	1501933	pUf68	FBgn0028577		SNP: INTRON	0.2759	0.7241	40	105	-10.1101	-5.152	-1.97767	-2.20883	120.212	140.432	4.74122e-06	T	C	C
	3L	1501933	Psa	FBgn0261243		SNP: UPSTREAM	0.2759	0.7241	40	105	-10.1101	-5.152	-1.97767	-2.20883	120.212	140.432	4.74122e-06	T	C	C
	3L	1502004	pUf68	FBgn0028577		SNP: INTRON	0.2945	0.7055	43	103	-9.33052	-4.998	-1.86445	-2.48728	119.836	138.497	5.62564e-06	C	T	T
	3L	1502004	Psa	FBgn0261243		SNP: UPSTREAM	0.2945	0.7055	43	103	-9.33052	-4.998	-1.86445	-2.48728	119.836	138.497	5.62564e-06	C	T	T
	3L	1502145	pUf68	FBgn0028577		SNP: INTRON	0.2759	0.7241	40	105	-9.71154	-5.046	-1.99454	-2.21909	119.927	139.35	7.6476e-06	A	G	G
	3L	1502145	Psa	FBgn0261243		SNP: UPSTREAM	0.2759	0.7241	40	105	-9.71154	-5.046	-1.99454	-2.21909	119.927	139.35	7.6476e-06	A	G	G
	3L	2375753	CG9004	FBgn0035336		SNP: SYNONYMOUS_CODING	0.3056	0.6944	44	100	9.39273	5.035	2.91263	2.88924	129.571	110.786	4.33791e-06	A	G	G
	3L	2375753	CG1587	FBgn0035337		SNP: DOWNSTREAM	0.3056	0.6944	44	100	9.39273	5.035	2.91263	2.88924	129.571	110.786	4.33791e-06	A	G	G
	3L	7487447	Cyp4d8	FBgn0015033		SNP: SYNONYMOUS_CODING	0.3383	0.6617	45	88	-8.5076	-5.015	-2.13058	-2.41018	119.171	136.186	6.44612e-06	G	A	G
	3L	7487447	Cyp316a1	FBgn0035790		SNP: DOWNSTREAM	0.3383	0.6617	45	88	-8.5076	-5.015	-2.13058	-2.41018	119.171	136.186	6.44612e-06	G	A	G
	3L	7487911	Cyp4d8	FBgn0015033		SNP: SYNONYMOUS_CODING	0.4589	0.5411	67	79	-9.74844	-4.727	-1.05799	-1.65545	117.348	136.845	2.52887e-06	A	G	A
	3L	10567297	A2bp1	FBgn0052062		SNP: INTRON	0.1844	0.8156	26	115	-9.78958	-5.846	-2.7751	-3.57352	121.31	140.889	9.29048e-06	T	A	A
	3L	19176963	fz2	FBgn0016797		SNP: INTRON	0.06849	0.93151	10	136	-15.6208	-9.416	-5.18466	-6.99924	122.97	154.212	1.97868e-06	T	A	A
	3L	19220699	fz2	FBgn0016797		SNP: INTRON	0.1748	0.8252	25	118	-10.388	-6.378	-4.22946	-3.82237	121.989	142.765	1.61442e-06	C	T	C
	3L	19226445	fz2	FBgn0016797		SNP: INTRON	0.3071	0.6929	43	97	-8.0514	-4.946	-2.63748	-2.96363	120.432	136.535	8.71649e-06	A	T	A
	3L	19305840	pip	FBgn0003089		SNP: INTRON	0.2836	0.7164	38	96	-10.2213	-5.608	-2.23695	-2.82396	119.758	140.201	1.24349e-06	A	G	A
	X	6174789	CR32745	FBgn0052745		SNP: UPSTREAM	0.06122	0.93878	9	138	-18.162	-9.367	-3.35755	-6.42585	123.012	159.336	7.2146e-06	A	G	G
	X	14094268	CRG11590	FBgn0030545		SNP: UTR_5_PRIME	0.1181	0.8819	17	127	12.4392	7.253	5.20872	4.27908	128.205	103.327	3.50804e-06	A	C	C
	X	14094268	yl	FBgn0004649		SNP: DOWNSTREAM	0.1181	0.8819	17	127	12.4392	7.253	5.20872	4.27908	128.205	103.327	3.50804e-06	A	C	C
	X	15550486				SNP	0.3356	0.6644	49	97	9.86972	4.87	1.52511	2.87291	130.698	110.958	4.52157e-06	A	G	A
	X	20533198	Cyp6vl	FBgn0031126		SNP: DOWNSTREAM	0.3446	0.6554	51	97	9.1305	4.975	1.70484	3.72766	130.674	112.413	1.94245e-06	A	G	A
	X	20533359	Cyp6vl	FBgn0031126		SNP: DOWNSTREAM	0.4726	0.5274	69	77	8.65559	4.583	1.69728	2.7977	132.466	115.155	5.08776e-06	T	G	T
	X	20533427				SNP	0.4863	0.5137	71	75	8.75021	4.505	1.47933	2.64253	132.983	115.483	7.35543e-06	A	T	A
	X	20533467				DEL	0.375	0.625	54	90	8.85829	4.689	1.80679	2.98086	131.015	113.298	7.1517e-06	ACA	A	ACA
	Chromosome	Position	Gene Symbol	FlyBase ID	Association with Starvation-Related Trait; Reference	Site Class	Minor Allele Frequency	Major Allele Frequency	MinorAlleleCount	MajorAlleleCount	Effect on SR This Study	Effect on Avg SR	Effect on SR Mackay et al	Effect on SR Everman and Morgan	Major Allele Mean	Minor Allele Mean	Mixed P Value	Minor Allele Call	Major Allele Call	Reference Allele
Mackay et al. 2012	4	655975	CG1732	FBgn0039915		SNP: UTR_3_PRIME	0.09278	0.90722	18	176	-6.43478	-6.47927	-5.332	-5.48064	124.687	137.557	8.19461e-06	G	A	A
	4	655975	CG9935	FBgn0039916		SNP: DOWNSTREAM	0.09278	0.90722	18	176	-6.43478	-6.47927	-5.332	-5.48064	124.687	137.557	8.19461e-06	G	A	A
	2L	5598693	CG18266	FBgn0031724		SNP: DOWNSTREAM	0.05025	0.94975	10	189	-8.35115	-7.32625	-6.345	-3.36474	124.473	141.175	9.03177e-07	A	T	T
	2L	12578209				SNP:	0.2762	0.7238	50	131	-0.416237	-2.03094	-3.313	-2.62203	124.795	125.627	6.12716e-07	C	A	C
	2L	13142019	CG9928	FBgn0032472		SNP: DOWNSTREAM	0.08718	0.91282	17	178	3.31722	3.78438	5.259	3.57288	126.237	119.602	2.6942e-06	T	C	C
	2L	20379285	CG16798	FBgn0032856		SNP: SYNONYMOUS_CODING	0.06566	0.93434	13	185	3.71204	4.80744	6.084	4.21153	125.441	118.017	5.91258e-06	T	G	G
	2L	22566852	CG40006	FBgn0058006		DEL: INTRON	0.2575	0.7425	43	124	2.26866	3.06896	3.391	3.07656	126.57	122.033	1.55812e-06	T	TGAAAAAAGAACAAACAATTAATCT	TGAAAAAAGAACAAACAATTAATCT
	2R	503851				SNP:	0.07447	0.92553	14	174	-1.41462	-2.29072	-4.814	-2.24002	125.94	128.769	9.02982e-06	T	G	G
	2R	10662062	kn	FBgn0001319		SNP: INTRON	0.1117	0.8883	21	167	0.144369	-1.34914	-4.12	-1.51921	124.101	123.812	7.49325e-06	T	G	T
	2R	16934371				SNP:	0.4352	0.5648	84	109	1.71531	2.69049	3.047	1.75279	126.525	123.094	3.46181e-06	A	G	A
	2R	16934381				SNP:	0.4286	0.5714	84	112	-0.915948	-1.87987	-2.811	-1.43053	124.267	126.099	2.30493e-06	G	C	C
	2R	19976766	snama	FBgn0086129		SNP: NON_SYNONYMOUS_CODING	0.0597	0.9403	12	189	-8.67648	-5.36791	-6.112	-0.927529	123.93	141.283	7.22648e-06	G	A	A
	2R	19982478	gek	FBgn0023081		SNP: SYNONYMOUS_CODING	0.055	0.945	11	189	-10.6912	-6.24031	-6.73	-1.14197	123.496	144.878	1.05885e-06	A	C	C
	3L	1392230	Ptp61F	FBgn0003138		SNP: INTRON	0.1055	0.8945	21	178	-0.521789	1.94942	5.029	3.15919	125.104	126.148	2.91308e-06	T	A	A
	3L	2711053	CG43955	FBgn0264606		SNP: INTRON	0.07538	0.92462	15	184	-7.68283	-7.44468	-5.779	-5.59908	122.988	138.354	2.63578e-06	G	T	T
	3L	4876217	CG17150	FBgn0035581		SNP: INTRON	0.245	0.755	49	151	1.39981	2.70343	3.609	2.05671	125.616	122.816	1.86273e-06	T	A	A
	3L	13882409	dysc	FBgn0264006		SNP: INTRON	0.2487	0.7513	47	142	-5.11773	-4.28178	-3.666	-3.95591	122.673	132.909	2.95791e-07	C	T	T
	3L	19220699	fz2	FBgn0016797		SNP: INTRON	0.1385	0.8615	27	168	-10.1602	-6.3779	-4.39	-3.82237	121.684	142.004	9.61451e-06	C	T	C
	3R	19030449	cnc	FBgn0262975	determination of adult lifespan; Sykiotis and Bohmann, 2008	INS: INTRON	0.2994	0.7006	53	124	-5.11244	-4.58228	-3.752	-2.45976	122.249	132.474	4.12996e-07	GTT	G	G
	3R	19030449	fzo	FBgn0011596		INS: UPSTREAM	0.2994	0.7006	53	124	-5.11244	-4.58228	-3.752	-2.45976	122.249	132.474	4.12996e-07	GTT	G	G
	3R	23206036	side	FBgn0016061		SNP: INTRON	0.1276	0.8724	25	171	-5.26312	-3.7138	-4.314	-1.91475	123.419	133.945	6.75968e-06	A	G	G
	X	5866252	Grip	FBgn0029830		SNP: INTRON	0.4264	0.5736	84	113	-4.97188	-2.70054	-2.711	-0.456732	121.063	131.007	9.9003e-06	T	A	A
	Chromosome	Position	Gene Symbol	FlyBase ID	Association with Starvation-Related Trait; Reference	Site Class	Minor Allele Frequency	Major Allele Frequency	MinorAlleleCount	MajorAlleleCount	Effect on SR This Study	Effect on Avg SR	Effect on SR Mackay et al	Effect on SR Everman and Morgan	Major Allele Mean	Minor Allele Mean	Mixed P Value	Minor Allele Call	Major Allele Call	Reference Allele
Everman and Morgan 2018	2R	11137567	scb	FBgn0003328		INS: INTRON	0.16	0.84	24	126	2.95953	2.86089	1.96124	4.398	126.134	120.215	2.31923e-06	GG	G	G
	2R	18540628	Cyp6d2	FBgn0034756		SNP: SYNONYMOUS_CODING	0.07407	0.92593	12	150	-6.28705	-5.83974	-2.65003	-6.154	124.157	136.731	9.16668e-06	C	T	T
	2R	18540628	nsr	FBgn0034740		SNP: DOWNSTREAM	0.07407	0.92593	12	150	-6.28705	-5.83974	-2.65003	-6.154	124.157	136.731	9.16668e-06	C	T	T
	3L	1184668				DEL:	0.2941	0.7059	45	108	-3.97107	-3.88374	-2.23314	-3.994	122.634	130.576	4.13675e-07	CC	C	CC
	3L	8406132	mtrm	FBgn0010431		SNP: START_GAINED	0.06098	0.93902	10	154	-8.29082	-6.19064	-2.67043	-7.494	124.065	140.646	1.44804e-06	T	C	C
	3L	8406132	exo70	FBgn0035892		SNP: INTRON	0.06098	0.93902	10	154	-8.29082	-6.19064	-2.67043	-7.494	124.065	140.646	1.44804e-06	T	C	C
	3L	13882409	dysc	FBgn0264006		SNP: INTRON	0.2549	0.7451	39	114	-5.00355	-4.28178	-3.57102	-3.97	122.985	132.992	1.87283e-06	C	T	T
	3R	8589421	beat-Vc	FBgn0038084		SNP: INTRON	0.2585	0.7415	38	109	3.6181	3.30162	2.43369	4.113	126.185	118.949	8.24534e-06	A	G	A
	3R	9375530				SNP:	0.06289	0.93711	10	149	-6.04864	-5.81739	-4.64542	-6.654	124.885	136.982	6.43918e-06	C	T	T
	3R	9375545				SNP:	0.06329	0.93671	10	148	-4.256	-5.52838	-5.3757	-6.827	124.793	133.305	3.15618e-06	A	T	T
	3R	11225946	Rbp	FBgn0262483		SNP: DOWNSTREAM	0.3767	0.6233	55	91	2.84229	2.27146	0.875707	3.551	127.877	122.192	6.82217e-06	G	A	A
	3R	13346027				SNP:	0.2237	0.7763	34	118	5.64347	3.60484	1.93107	4.109	127.312	116.025	6.8029e-06	A	G	A
	3R	14165044	CG15803	FBgn0038606		SNP: INTRON	0.1961	0.8039	30	123	-1.4658	-2.69206	-1.67055	-4.656	124.753	127.685	4.81619e-07	C	G	G
	3R	14165045	CG15803	FBgn0038606		SNP: INTRON	0.1948	0.8052	30	124	-1.30259	-2.62386	-1.66663	-4.655	125.08	127.685	4.87787e-07	T	C	C
	3R	18982491	unk	FBgn0004395	larval development; Mohler et al. 1992	SNP: INTRON	0.08642	0.91358	14	148	-4.80929	-6.70126	-5.20683	-6.384	124.542	134.16	4.25638e-06	A	G	G
	3R	19180714	DNApol-epsilon	FBgn0264326		SNP: SYNONYMOUS_CODING	0.1569	0.8431	24	129	-5.9751	-4.92269	-2.60528	-4.378	123.119	135.07	8.37438e-06	T	C	C
	3R	19180714	ATPsyn-Cf6	FBgn0016119		SNP: DOWNSTREAM	0.1569	0.8431	24	129	-5.9751	-4.92269	-2.60528	-4.378	123.119	135.07	8.37438e-06	T	C	C
	3R	20308758				SNP:	0.1863	0.8137	30	131	-2.94124	-3.20997	-2.19019	-4.528	123.734	129.616	3.02307e-06	A	T	A
	3R	22808096	CG14253	FBgn0039467		SNP: INTRON	0.1688	0.8312	27	133	-3.78873	-3.38387	-0.807299	-4.339	124.234	131.812	5.16429e-06	T	C	T
	3R	22812096	CG31075	FBgn0051075		SNP: INTRON	0.172	0.828	27	130	-1.70516	-2.64663	-0.684343	-4.294	124.443	127.853	7.90237e-06	C	T	T
	3R	22812096	CG14253	FBgn0039467		SNP: DOWNSTREAM	0.172	0.828	27	130	-1.70516	-2.64663	-0.684343	-4.294	124.443	127.853	7.90237e-06	C	T	T
	3R	24186811				SNP:	0.2065	0.7935	32	123	-6.53711	-4.55667	-2.3877	-4.21	122.62	135.694	4.2594e-06	C	T	T
	3R	24425153	Noa36	FBgn0026400		DEL: UPSTREAM	0.07051	0.92949	11	145	0.499748	-3.85065	-4.49796	-7.044	125.247	124.248	5.09711e-06	G	GGCCAGCGTGCATTTTGGAATATGCTCTGCGAGTGGAGATATTCCTTGAAAAGTAGCTAGCCGATTTTTTTATTGCATATTTTATATACTTTCTG	GGCCAGCGTGCATTTTGGAATATGCTCTGCGAGTGGAGATATTCCTTGAAAAGTAGCTAGCCGATTTTTTTATTGCATATTTTATATACTTTCTG
	3R	24425153	Hrb98DE	FBgn0001215		DEL: UPSTREAM	0.07051	0.92949	11	145	0.499748	-3.85065	-4.49796	-7.044	125.247	124.248	5.09711e-06	G	GGCCAGCGTGCATTTTGGAATATGCTCTGCGAGTGGAGATATTCCTTGAAAAGTAGCTAGCCGATTTTTTTATTGCATATTTTATATACTTTCTG	GGCCAGCGTGCATTTTGGAATATGCTCTGCGAGTGGAGATATTCCTTGAAAAGTAGCTAGCCGATTTTTTTATTGCATATTTTATATACTTTCTG
	X	10895154	CG42339	FBgn0259241		SNP: INTRON	0.08075	0.91925	13	148	-5.46978	-5.55397	-3.88014	-6.597	124.313	135.253	1.92933e-06	C	A	A
	X	13708989	Clic	FBgn0030529		INS: INTRON	0.1962	0.8038	31	127	-5.67837	-4.27976	-2.26852	-3.85	123.134	134.491	6.73331e-06	TC	T	T
	X	20533198	Cyp6v1	FBgn0031126		SNP: DOWNSTREAM	0.3497	0.6503	57	106	9.44919	4.97454	1.60615	3.72	131.097	112.199	2.51879e-06	A	G	A
